# Supplementary material for: Intraocular Pressure Elevation Compromises Retinal Ganglion Cell Light Adaptation
Source: PubMed Central journal article supplement (PMC7571289; doi:10.1167/iovs.61.12.15), 2020-10-16
Supplement: iovs-61-12-15_s001.pdf [file iovs-61-12-15_s001.pdf]

**Supplemental Table and Figure for:**

Intraocular Pressure Elevation Compromises Retinal Ganglion Cell Light Adaptation

Xiaofeng Tao<sup>1</sup>, Jasdeep Sabharwal<sup>1,2</sup>, Samuel M. Wu<sup>1,2</sup>, and Benjamin J. Frankfort<sup>1,2</sup>

<sup>1</sup> Department of Ophthalmology, Baylor College of Medicine and <sup>2</sup> Department of Neuroscience, Baylor College of Medicine, Houston, Texas 77030

**Supplemental Table 1. Comparisons of RGC activity and STA properties**

| Source                                                             | Sum of Squares | df  | Mean Square | F     | p      |
|--------------------------------------------------------------------|----------------|-----|-------------|-------|--------|
| <b>Fig. 2C: mean spontaneous firing rate (Hz)</b>                  |                |     |             |       |        |
| Subtype                                                            | 58.78          | 2   | 29.39       | 4.99  | 0.0072 |
| IOP                                                                | 13.29          | 3   | 4.43        | 0.75  | 0.5214 |
| Subtype*IOP                                                        | 26.19          | 6   | 4.36        | 0.74  | 0.6165 |
| Error                                                              | 2590.19        | 440 | 5.89        |       |        |
| Total                                                              | 2758.32        | 451 |             |       |        |
| <b>Fig. 3D: mean RF size (<math>\mu\text{m}</math>)</b>            |                |     |             |       |        |
| Subtype                                                            | 2745.17        | 2   | 1372.58     | 5.78  | 0.0033 |
| IOP                                                                | 774.15         | 3   | 258.05      | 1.09  | 0.3543 |
| Subtype*IOP                                                        | 1632.42        | 6   | 272.07      | 1.15  | 0.3345 |
| Error                                                              | 104922.58      | 442 | 237.38      |       |        |
| Total                                                              | 112223.23      | 453 |             |       |        |
| <b>Fig. 4E: mean transitional zone shift (<math>\sigma</math>)</b> |                |     |             |       |        |
| Subtype                                                            | 6.84           | 2   | 3.42        | 0.71  | 0.4905 |
| IOP                                                                | 46.70          | 3   | 15.57       | 3.25  | 0.0219 |
| Subtype*IOP                                                        | 22.54          | 6   | 3.76        | 0.78  | 0.5835 |
| Error                                                              | 2120.08        | 442 | 4.80        |       |        |
| Total                                                              | 2214.69        | 453 |             |       |        |
| <b>Fig. 5D: mean center peak time (ms)</b>                         |                |     |             |       |        |
| Subtype                                                            | 4345.92        | 2   | 2172.96     | 2.66  | 0.0714 |
| IOP                                                                | 38199.17       | 3   | 12733.06    | 15.56 | 0.0000 |
| Subtype*IOP                                                        | 7052.39        | 6   | 1175.40     | 1.44  | 0.1989 |
| Error                                                              | 361620.20      | 442 | 818.15      |       |        |
| Total                                                              | 524812.33      | 453 |             |       |        |
| <b>Fig. 6D: mean surround peak time (ms)</b>                       |                |     |             |       |        |
| Subtype                                                            | 224846.47      | 2   | 112423.23   | 1.74  | 0.1799 |
| IOP                                                                | 13245.34       | 3   | 4415.11     | 0.07  | 0.9767 |
| Subtype*IOP                                                        | 129612.04      | 6   | 21602.01    | 0.33  | 0.9180 |
| Error                                                              | 8409026.08     | 130 | 64684.82    |       |        |
| Total                                                              | 8842836.01     | 141 |             |       |        |

**df:** degree of freedom**Subtype:** RGC subtypes, including ON, OFF, and ON-OFF**IOP:** eye conditions, including Normal, Control, Low IOP, and High IOP

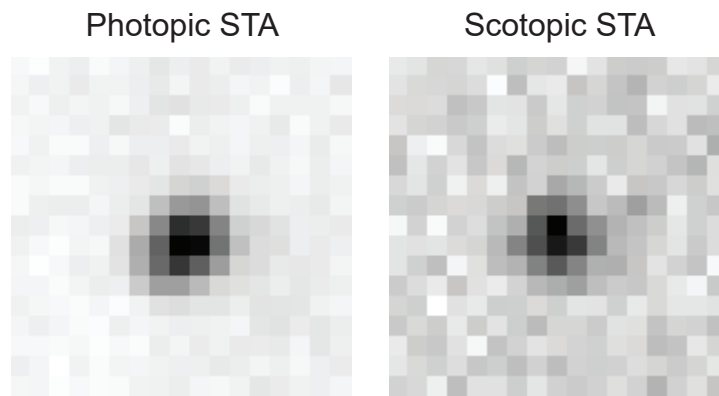

**Supplemental Figure 1.** Photopic and scotopic STAs of a representative RGC. This OFF type RGC was recorded from a normal (uninjected) eye. The size of the center photopic RF is 71.1  $\mu\text{m}$  and the size of the center scotopic RF is 73.6  $\mu\text{m}$ . The area for each panel is 850 x 850  $\mu\text{m}$ .
